# CRTC3 is a coincidence detector for cAMP and growth factor signals in melanocytes and melanoma.

Jelena Ostojic<sup>1\*</sup>, Tim Sonntag<sup>1</sup>, Nhut Ngyen<sup>1</sup>, Joan M. Vaughan<sup>1</sup>, Maxim Shokhirev<sup>1</sup>, Marc Montminy<sup>1\*</sup>

(1) Clayton Foundation Laboratories for Peptide Biology, The Salk Institute for Biological Studies, La Jolla, California 92037, USA

(\*) To whom correspondence should be addressed. Email: [montminy@salk.edu](mailto:montminy@salk.edu); [jostojic@salk.edu](mailto:jostojic@salk.edu)

## Abstract

Triggering of cAMP and mitogen-activated (MAPK) pathways in response to hormonal and growth factor cues promotes melanocyte pigmentation and survival in part through induction of the master regulator MITF by the cAMP-responsive factor CREB. We examined the role of CREB coactivators (CRTC1-3) in transduction of cAMP and MAPK signals in melanocytes. We found that knockout of the CRTC3 gene in mice and B16F1 melanoma cells decreases pigmentation by directly regulating the expression of the melanosomal transporter OCA2. In addition to effects of cAMP, CRTC3 activation was also promoted by ERK1/2-mediated phosphorylation at Ser391; amounts of phosphorylated CRTC3-S391 were constitutively elevated in human melanoma cells expressing mutated BRAF or NF1. Knockout of CRTC3 in A375 melanoma cells impaired their anchorage-independent growth, migration and invasiveness, whereas CRTC3 over-expression increased survival in response to BRAF inhibition by vemurafenib. Analysis of spontaneous CRTC3 mutations in melanomas reveals that increased activity of this co-activator is associated with reduced patient survival. Our results highlight the importance of CRTC3 in pigmentation and melanoma progression.

## Introduction

Melanoma arises from transformation of melanocytes, the pigment producing cells in the skin. Although the role of pigment in modulating melanoma risk is not fully understood, cutaneous melanomas are often correlated with light skin and poor tanning response<sup>1</sup>. Many pigment genes influence melanoma susceptibility<sup>2,3</sup>; indeed, melanomas subvert developmental programs present in normal melanocytes to maintain metabolic heterogeneity, which plays a critical role in treatment resistance and relapse<sup>4-7</sup>.

Elevations in intracellular cAMP upregulate melanin synthesis, DNA repair, and survival pathways<sup>8</sup>; and cAMP signaling underlies both basal (constitutive) as well as stimulus-induced pigmentation, depending in part on intracellular cAMP levels<sup>9,10</sup>. These reflect the relative activities of cAMP-generating adenylyl cyclases and hydrolyzing phosphodiesterases (PDEs).

cAMP stimulates the PKA-mediated phosphorylation of CREB, leading to the expression of target genes including MITF, the master melanocyte regulator and a melanoma oncogene<sup>11-13</sup>. In addition to stimulating the expression of genes that promote growth and survival, MITF also regulates the expression of melanogenic enzymes such as tyrosinase (TYR) and dopachrome tautomerase (DCT)<sup>14</sup>.

Superimposed on the effects of cAMP, the MAPK pathway also modulates melanocyte proliferation and differentiation, in part by regulating MITF activity<sup>15-17</sup>. MAPK and cAMP pathways show a nonlinear interaction which can be synergistic or antagonistic, depending on the signaling environment<sup>18-21</sup>.

The MAPK pathway is commonly hyperactivated in melanomas, due to mutations in RAS and BRAF that lead to downstream induction of the Ser/Thr kinases ERK1/2<sup>22</sup>. BRAF inhibitors are effective in the treatment of melanomas, but rates of acquired treatment resistance and relapse are also high<sup>7</sup>, pointing to the involvement of other signaling pathways that can circumvent BRAF inhibition. Within this group, the CREB pathway has been reported to confer resistance to BRAF blockers<sup>23</sup>.

CREB Regulated Transcription Coactivators (CRTC1-3) function as effectors of cAMP signaling. In the basal state, salt-inducible kinases (SIKs) sequester CRTCs in the cytoplasm via their phosphorylation at 14-3-3 binding sites. Increases in cAMP promote PKA-mediated phosphorylation and inhibition of the SIKs, leading to CRTC dephosphorylation, nuclear migration and recruitment to CREB binding sites<sup>24</sup>. In keeping with their considerable sequence homology, CRTCs have been found to exert overlapping effects on CREB target gene expression; yet knockout studies also reveal distinct phenotypes for each family member<sup>25–28</sup>. In melanocytes, CRTCs have been proposed as targets for treatment of hyperpigmentary disorders by virtue of their ability to mediate effects of CREB on MITF expression<sup>29–32</sup>.

Here we show that CRTC3 is the only CRTC family member affecting pigmentation and melanocyte fitness in knock-out (KO) mouse models. Remarkably, MITF expression was only marginally decreased in CRTC3 KO animals. Using CRTC3-depleted murine and human melanoma cells, we found that CRTC3 regulates genes involved in pigmentation and cell motility. CRTC3 activity is upregulated in subsets of human melanomas, where it is associated with reduced survival. The specificity of the CRTC3 phenotype reflects in part the ability of this coactivator to integrate both cAMP and MAPK signals. Our results point to potential therapeutic benefit of CRTC3 inhibitors in the treatment of pigmentary disorders and cutaneous melanoma.

## Results

### **Absence of CRTC3 in mice impairs melanocyte differentiation.**

We noticed that mice with a knockout of CRTC3 but not CRTC1 or CRTC2 had decreased fur pigmentation, (65% of wild-type (WT)) (Fig. 1a, b). Knowing the importance of the CREB pathway in regulating MITF expression and melanogenesis, we considered that CRTC3 expression in skin could exceed those for CRTC1 and CRTC2. However, all three CRTCs were comparably expressed in both whole skin and in primary melanocytes (Fig. 1c, d, e). CRTC3 KO skin did not show defects in protein accumulation of MITF, or those of its target genes (TYR, DCT, PMEL), likely reflecting compensation by CRTC1 and CRTC2 (Fig. 1e). To identify changes in gene expression that might explain the CRTC3

KO phenotype, we performed RNA-sequencing on WT and CRTC3 KO neonatal skins. Consistent with protein accumulation data, mRNA levels for MITF and major melanogenic enzymes were not significantly altered in the CRTC3 knock-out (Suppl. Table 1). Transporters were amongst the most significant down-regulated gene categories; indeed, three of these genes were melanocyte-specific (Fig. 1f, Suppl. Fig. 1a). Although melanocytes account for less than 10% of cells in the skin, a melanocyte-specific gene OCA2 (oculo-cutaneous albinism II) scored as the most significantly down-regulated gene in CRTC3 KOs (Suppl. Table 1). OCA2 encodes a transmembrane anion transporter that regulates melanosomal pH, and that is essential for the activity of melanogenic enzymes, in particular TYR<sup>33,34</sup>. Alterations in OCA2 underlie natural pigmentation variants, albinism and melanoma risk in humans<sup>35–</sup>

39

We used a DCT promoter-Green Fluorescent Protein (GFP) reporter to evaluate neonatal melanoblast populations in skins of WT and CRTC3 KO animals<sup>40,41</sup>. No significant differences in the percentage of GFP positive melanoblasts were noted between the two genotypes (Suppl. Fig. 1b). Similar to whole skin, OCA2 mRNA amounts were also reduced in CRTC3 KO melanoblasts, while MITF and other core melanogenic enzymes were unaffected (Fig. 1g).

We evaluated the differentiation of WT and CRTC3 KO melanoblasts following exposure to cholera toxin (CTX) and phorbol ester 12-o-tetradecanoylphorbol-13-acetate (TPA), activators of cAMP and MAPK cascades, respectively. CTX and TPA induced melanin synthesis in WT, CRTC1 KO, and CRTC2 KO melanoblasts, but not in CRTC3 KO (Fig. 1h). Rather, surviving CRTC3 KO cells expressed fibroblast markers, but not melanocyte markers (Suppl. Fig. 1c). We considered that *ex-vivo* culture may exacerbate the phenotype of CRTC3 KO mouse melanocytes due to increases in reactive oxygen species<sup>42</sup>. Supplementing the primary culture with catalase, an antioxidant cocktail, or co-culturing with feeder keratinocytes did not rescue differentiation of CRTC3 KO melanocytes, however. These results indicate that the selective loss of CRTC3, but not CRTC1 or CRTC2 impairs melanocyte differentiation.

## **CRTC3 regulates OCA2 expression.**

To further characterize the role of CRTC3 in pigmentation, we used B16F1 mouse melanoma cells, which produce melanin following exposure to cAMP agonists<sup>43</sup>. CRISPR or RNAi-mediated depletion of CRTC3 reduced B16F1 cell pigmentation, which was rescued by CRTC3 re-expression (Fig. 2a, Suppl. Fig. 1d, e). Despite profound pigmentation defects, CRTC3 KO cells expressed comparable amounts of MITF and TYR proteins to control cells (CTRL); they were able to accumulate both proteins efficiently following FSK exposure (Suppl. Fig. 1f). TYR DOPA oxidase activity was decreased in CRTC3-depleted cells, by in-gel and whole lysate analyses; re-expression of CRTC3 restored TYR activity (Fig. 2b, c). TYR activity depends on correct maturation of melanosomes<sup>44</sup>, prompting us to assess melanosome populations in CTRL and CRTC3 KO cells. Using transmission electron microscopy (TEM), we noted that maturation of melanosomes was severely impaired in CRTC3 KO cells as evidenced by a high number of early (I and II) versus melanized late stage (II and IV) melanosomes (Fig. 2d, Suppl. Fig. 1g). These results indicate that depletion of CRTC3 reduces pigmentation by altering an essential step in melanosome maturation, which is necessary for TYR enzyme activity.

To identify direct targets of CRTC3 that contribute to melanin production, we performed ChIP-seq and RNA-seq studies in B16F1 cells. Exposure to FSK triggered CRTC3 recruitment to regulatory regions for genes involved in pigmentation, vesicular trafficking, and MAPK signaling. CRTC3 was primarily recruited to CREB binding sites and in close proximity to MITF-bound M-box sites (Suppl. Fig. 1h, i). Pointing to compensation between CRTC family members, knock-out of CRTC3 decreased the expression of canonical CREB targets and MITF only modestly (Suppl. Table 2, 3). Genes down-regulated in the CRTC3 KO were clustered in processes involved in substrate interaction and pigmentation; most of these were efficiently rescued by re-expression of CRTC3 (Fig. 2e, Suppl. Fig. 1j).

OCA2 was prominent within the subset of CRTC3-regulated genes (Suppl. Table 3). Exposure to FSK simulated binding of CRTC3, CREB and MITF to a conserved OCA2 enhancer located in intron 86 of the upstream HERC2 gene (Fig. 2f)<sup>45,46</sup>. Concurrently, exposure to FSK increased occupancy of

phosphorylated polymerase II over the OCA2 gene body (Fig. 2f). OCA2 mRNA amounts were increased after 2h of FSK stimulation, followed by increases in protein amounts as determined by immunoblotting with a validated OCA2 antiserum (Fig. 2g, Suppl. Fig. 2a-d). Induction of OCA2 was severely blunted in CRT3 KO and recovered with CRT3 re-expression (Fig. 2g).

In principle, the induction of OCA2 by cAMP could reflect the up-regulation of MITF, which also stimulates OCA2 expression<sup>45</sup>. Mutation of CREB or MITF binding sites individually within the OCA2 enhancer reduced the activity of the OCA2 enhancer-driven luciferase reporter, which was impaired further by the mutation of both sites (Suppl. Fig. 2e, Fig. 2h). The effects of CRT3 on OCA2 expression appear to account for reduced pigmentation since overexpression of OCA2 in CRT3 KO cells rescued melanin production (Fig. 2i).

### **Regulation of CRT3 by cAMP and ERK1/2.**

Having seen the selective loss of pigmentation in CRT3 KO mice, we wondered if the effects on OCA2 were also CRT3-specific. We generated a CRISPR KO of CRT3 and assessed its melanin production and OCA2 status in B16F1 cells. While depletion of CRT3 impacted both basal and FSK-induced OCA2 amounts, KO of CRT3 reduced FSK-induced OCA2 protein amounts only modestly. Extracellular melanin output was largely unchanged in CRT3 KO, indicating that CRT3 is dispensable for melanin production in this setting (Suppl. Fig. 2f).

We hypothesized that CRT3 may be selectively activated in melanocytes by signals other than cAMP or by low levels of cAMP that are otherwise insufficient for activation of CRT1 and CRT2. In response to mitogenic signals, ERK1/2-mediated phosphorylation of CRT3 at Ser<sup>391</sup> has been found to promote its interaction with protein phosphatase 2 (PP2A), leading to the dephosphorylation of CRT3 at inhibitory 14-3-3 binding sites<sup>47</sup>. Exposure of B16F1 cells to several ERK1/2 activators (SCF, HGF, TPA) promoted the phosphorylation of CRT3 at Ser<sup>391</sup> (Fig. 3a). In line with previous observations, Ser<sup>391</sup>-phosphorylated CRT3 was predominantly nuclear-localized (Suppl. Fig. 3a). Correspondingly, loss of CRT3 blocked melanin production and re-expression of CRT3 rescued

these effects, but the overexpression of CRTC2 did not. Notably, over-expression of the hybrid CRTC2 protein containing the PP2A binding domain of CRTC3<sup>47</sup> was competent to rescue melanin synthesis (Fig. 3b). Mutation of Ser<sup>391</sup> to Ala reduced CRTC3 effects on melanin production relative to WT CRTC3 (Suppl. Fig. 3b).

To test whether CRTC3 is preferentially activated at lower cAMP levels relative to other CRTCs, we exposed B16F1 cells to a range of FSK concentrations; at 800nM, FSK modestly increased intracellular cAMP levels and melanin synthesis (Fig. 3c). Low FSK (800nM) increased nuclear amounts of CRTC3 to a greater extent than CRTC1 or CRTC2 (Fig. 3d, Suppl. Fig. 3c). Low FSK treatment also stimulated ERK1/2 activation to a similar degree as treatment with SCF, which promoted nuclear translocation of CRTC3, but not CRTC1 or CRTC2 (Fig. 3d). Collectively, these results indicate that CRTC3 has increased sensitivity to cAMP and ERK1/2 signals compared to CRTC1 and CRTC2.

### **CRTC3 contributes to oncogenic properties of transformed melanocytes.**

The RAS-MAPK pathway is hyperactivated in over 90% of human melanomas<sup>22,48</sup>, prompting us to test whether corresponding increases in ERK1/2 activity up-regulate CRTC3. Amounts of phosphorylated CRTC3-Ser<sup>391</sup> correlated with the extent of ERK1/2 activity in several human cell lines. HEK293T cells have low basal ERK1/2 activity and correspondingly low levels of CRTC3 phospho-Ser<sup>391</sup>; by contrast, A375 and MeWO cells have high basal ERK1/2 activity and increased levels of phospho-Ser<sup>391</sup> (Fig. 3e, 3f).

A375 human melanoma cells express an oncogenic gain-of-unction BRAF (V600E) mutant protein; they also have low levels of cAMP signaling due to increased expression of phosphodiesterases<sup>49</sup>, which provided us with a window to evaluate selective effects of high ERK1/2 signaling on CRTC3 activity. CRTC3 was predominantly nuclear-localized in A375 but not HEK293T cells, consistent with their relative ERK1/2 and CRTC3-Ser<sup>391</sup> phosphorylation profiles (Fig. 3g). Treatment of A375 cells with ERK1/2 inhibitor decreased CRTC3-pSer<sup>391</sup> amounts and correspondingly reduced CREB activity over the MITF promoter (Fig. 3f, 3h).

We tested the regulatory contribution of CRTC3 to oncogenic properties of melanoma cells by generating CRISPR-derived CRTC3 KO A375 cells (Suppl. Fig. 3d). Loss of CRTC3 had no effect on proliferation, but it impaired anchorage-independent growth in both A375 and B16F1 melanoma cells (Suppl. Fig. 3e, f, g, h). Anchorage-independent growth was also reduced in cells expressing phosphorylation-defective CRTC3-Ser<sup>391</sup>Ala mutant relative to WT CRTC3 (Suppl. Fig. 3i).

To determine transcriptional effects of CRTC3 in this human melanoma model, we performed RNA-sequencing on CTRL and CRTC3 KO A375 cells. Loss of CRTC3 down-regulated genes involved in cAMP signaling, cell migration and chemotaxis (Fig. 4a, Suppl. Table 4). A number of canonical CREB targets were significantly down-regulated in the KO cells, amongst these the phosphodiesterases PDE4B and PDE4D (Fig. 4a, Suppl. Table 4). PDE4 has been found to promote melanoma progression by reducing inhibitory effects of cAMP on activation of the MAPK pathway<sup>21,49–51</sup>. Based on its ability to stimulate PDE4 expression, we reasoned that loss of CRTC3 should lead to increases in intracellular cAMP. Supporting this idea, CRTC3 KO cells had higher basal concentrations of cAMP, higher PKA activation, and greater response to intermediate concentrations of FSK (Fig. 4b, Suppl. Fig. 4a).

Increases in cAMP signaling have been shown to inhibit cancer cell motility, depending on the signaling context<sup>52</sup>. Treatment of A375 cells with cAMP agonists inhibited cell migration in a dose-dependent manner; these effects were reversed following exposure to the PKA inhibitor H89 (Suppl. Fig. 4b, c). Consistent with this observation, migration and invasiveness were reduced in CRTC3 KO cells; addition of H89 also rescued migration in this setting (Fig. 4c, d).

Small molecule inhibitors of BRAF constitute effective treatment options for patients with BRAF-mutant melanomas. Up-regulation of the CREB pathway has been found to confer resistance to BRAF inhibition<sup>23</sup>, prompting us to evaluate the potential role of CRTC3 in modulating the treatment response of A375 cells to BRAF inhibition by vemurafenib (PLX4032). Exposure to PLX4032 decreased cell survival comparably in CTRL and CRTC3 KO A375 cells. Notably, transient over expression of CRTC3 increased viability in cells exposed to PLX4032 but not to cisplatin, a DNA cross-linking compound (Suppl. Fig. 4d, e). Taken together, these results show that CRTC3 responds to ERK1/2 and cAMP signals in human melanoma cells and that its activity contributes to their oncogenic properties.



### **Spontaneous CRTC3 mutations in human melanomas modulate its activity.**

To determine if CRTC3 activity is altered in human melanoma, we performed CRTC3 profiling on a cohort of 367 melanoma patients from the TCGA database. Alterations of CRTC3 were observed in 10% of samples, and most of these increased CRTC3 expression; these were associated with reduced patient survival (Fig. 4e, Suppl. Fig. 4f). We evaluated the transcriptional signature of melanomas with alterations in CRTC3. To this end, we performed a co-expression analysis in the TCGA patient cohort and compared gene groups showing high unique positive correlation with each CRTC family member (Suppl. Table 5). In line with our molecular data, transcript signatures related to CRTC3 showed enrichment in pigmentation and cell migration (Fig. 4f, g, Suppl. Fig. 4g).

Based on public data<sup>53,54</sup> we compiled a list of spontaneous CRTC3 mutations in melanoma and found that 20% of these occur in or near regulatory 14-3-3 binding sites (Suppl. Fig. 4h, Suppl. Table 6). Phosphorylation of conserved serines within SIK consensus motifs (LXBS/TXSXXXL) sequesters CRTC family in the cytoplasm by 14-3-3 binding; disruption of these sites would be expected to increase CRTC activity<sup>24,55</sup>. Based on their location on CRTC3 protein sequence we chose six patient mutations for further analysis in a CRE-luciferase reporter assay. Three of these mutants mapped to 14-3-3 binding sites (L166F, P331H, S368F), and one to a CRTC3 sumoylation site<sup>56</sup> (P142S). Almost all of the mutant CRTC3 proteins stimulated reporter activity to a greater extent than WT, suggesting that CRTC3 is indeed upregulated in a subset of melanoma tumors (Fig. 4h).

## **Discussion**

CRTC family members share extensive sequence homology within their CREB-binding, regulatory and trans-activation domains. Correspondingly, loss of any one family member can be readily compensated by other family members, as we observed with MITF expression. By contrast, OCA2 was significantly down-regulated following CRTC3 KO, accounting for the deficiencies in melanin synthesis without

corresponding reductions in protein amounts of melanogenic enzymes. We found that the induction of OCA2 is mediated in part by recruitment of CREB/CRTC to CREB binding sites on a distal enhancer in the *HERC2* gene. CRTC3 reduced the baseline accumulation of OCA2, translating into lower net induction of protein and pigmentation even in presence of high intracellular cAMP.

By contrast with other CRTCs, CRTC3 appears to stimulate CREB target gene expression in response to growth factors that activate ERK1/2. Phosphorylation of Ser<sup>391</sup> primes CRTC3 for subsequent activation by modest increases in cAMP that are sufficient to dephosphorylate and fully activate CRTC3, but not CRTC1 or CRTC2. cAMP and ERK1/2 pathways are co-activated in melanocytes, and their cooperativity may account for higher baseline activity of CRTC3 in melanocytes and melanoma cells. We propose a model that distinguishes outcomes based on multi-pathway signal integration. A high cAMP state constitutes a strong differentiation signal mediated by activation of all CRTCs (Suppl. Fig. 4i). Under low cAMP signaling conditions, ERK1/2 and cAMP activate CRTC3 cooperatively to promote CREB-target gene expression (Fig. 4i).

BRAF inhibitors represent a mainstay for the treatment of melanoma, and reducing resistance to these inhibitors appears critical in improving patient survival. Knockout of CRTC3 in a BRAF-mutant melanoma model increased intracellular concentrations of cAMP, leading to PKA activation, and impairment of chemotactic migration, invasion, and anchorage-free growth. Conversely, up-regulation of CRTC3 was associated with improved cell viability in cells exposed to vemurafenib.

Remarkably, we identified that spontaneous CRTC3 point mutants in a subset of human melanomas map to regulatory region that normally sequester this coactivator in the cytoplasm. Our data suggest that the increased activity of CRTC3 in this setting contributes to melanoma progression by increasing the expression of CREB target genes involved in motility, invasiveness, or viability. Our results highlight CRTC3 as a potential target in the management of pigmentary disorders and melanoma.

# Methods

## Animal studies

All animal procedures were approved by the Institutional Animal Care and Use Committee of the Salk Institute. Mice were housed in colony cages with a 12 hr light/12 hr dark cycle in a temperature-controlled environment. C57BL6 were purchased from Jackson Laboratories. Knock-outs of CRTCL, CRTCL2 and CRTCL3 were previously described<sup>25,27,57</sup>. iDCT-GFP mice were obtained from NCI Mouse Repository.

## Primary melanoblast isolation and melanocyte culture

Primary cells were isolated from whole epidermises of 2 days old WT, CRTCL KO, CRTCL2 KO and CRTCL3 KO pups and cultured in differentiation media containing TPA (P1585, Sigma) and cholera toxin (C8052, Sigma), following previously described detailed protocol<sup>58</sup>. For skin melanoblast quantification, WT and CRTCL3 KO mice were crossed with mice carrying iDCT:GFP transgene system. Pregnant females were given 1mg/ml doxycycline in water and epidermal cell suspensions were isolated from 2 days old pups (WT N=5, KO N=4). GFP positive cells were counted through fluorescence-activated cell sorting (Becton-Dickinson Influx™ cytometer). To account for differences in total amounts of cells isolated from each animal, quantification was expressed as percentage of GFP positive cells per epidermis. In experiments where XB2 feeder keratinocytes were used, cells were obtained from Wellcome Trust Functional Genomics Cell Bank and prepared using mitomycin c treatment (M4287, Sigma), as previously described<sup>58</sup>. In some experiments, catalase (LS001896, Worthington Biochemical) and an antioxidant supplement (A1345, Sigma) were added to the primary cultures in the attempt to improve survival and differentiation of CRTCL3 KO melanoblasts.

## Cell line culture

B16F1, A375, MeWO and HEK293T cells were obtained from the American Type Culture Collection. Cells were tested for mycoplasma contamination with MycoAlert kit (LT07-418, Lonza) before use in experiments. A375, MeWO and HEK293T cells were consistently cultured in DMEM media (Gibco®,

high glucose), supplemented with 10% fetal bovine serum (FBS, Gemini Bio-Products) in 5% CO<sub>2</sub> at 37°C. Two different culture modes were tested for B16F1 in order to preserve their melanogenic potential. These were cultures in RPMI 1640 medium (Gibco®, high glucose) without phenol red supplemented with 10% FBS in 10% CO<sub>2</sub> or DMEM without phenol red supplemented with 10% FBS in 5% CO<sub>2</sub>. In both cases cells were plated sparsely (1x10<sup>4</sup>) for regular maintenance. For induction of melanogenesis, cells were grown to 65% confluence, making sure to avoid cell clumping, and treated with compounds that stimulate melanin synthesis (Forskolin (FSK, F6886, Sigma) or IBMX (I5879, Sigma)). Cells grown in RPMI 1640 were switched to DMEM before stimulation. Maintenance plates were regularly tested (every 3 passages) to confirm the ability of cells to produce melanin. All cells were used for experiments between passages 4 and 12, after which they were discarded and a new low-passage batch thawed for the next experimental round. Under these conditions, there was no difference in melanin output of B16F1 cells between the two culture modes, so we used consistent DMEM for most shown results.

Silencing of CRT3 in B16F1 cells was performed by transfecting cells with pSilencer 2.1-U6 puro plasmid (AM5762, Applied Biosystems) carrying CRT3 shRNA constructs. 5' phosphorylated double stranded CRT3 oligonucleotides were cloned into BamHI and HindIII sites of the pSilencer 2.1-U6 puro plasmid, according to the manufacturer's protocol. 0.8x10<sup>6</sup> cells were transfected with 1.5µg plasmid DNA using Lipofectamine 2000 (11668019, Invitrogen). Selection with 2µg/ml puromycin (P8833, Sigma) was started 48h post transfection and maintained for at least 7 days before testing bulk cell populations for successful CRT3 knock-down and melanin induction. Empty vector was used as a control.

Sequences of working constructs:

Sh1:

5'GATCCGCTTCAGCAACTGCGCCTTTTCAAGAGAAAGGCGCAGTTGCTGAAGTTTTTTGGAAA 3'

Sh3:5'GATCCGAAGCTCCTCTGGTCTCCATTCAAGAGATGGAGACCAGAGGAGCTTCTTTTTTGGAA

A 3'

Sh4:

5'GATCCGCACATCAAGGTTTCAGCATTCAAGAGATGCTGAAACCTTGATGTGCTTTTTTGGAAA 3'

For CRISPR-Cas9 knockout of CRTC1 and CRTC3, B16F1 cells were separately transfected with two different guide RNAs (gRNAs) per gene, cloned into pSpCas9(BB)-2A-GFP (PX458) (Addgene plasmid # 48138)<sup>59</sup>. CTRL cells were transfected with the empty vector. Single clones were selected by fluorescence-activated cell sorting (Becton-Dickinson Influx™ cytometer) after 48 hours. The gRNAs target exons 1 and 3 of CRTC1 and exons 1 and 8 of CRTC3:

mC1g1: 5' CACCGTGACAGGGGTCGACGGTGCG 3' ex3

mC1g2: 5' CACCGTCACCCGCGCGGCCCGCGTC 3' ex1

mC3g1: 5' CACCGCATCAAGCCGATAATGTTTCG 3' ex1

mC3g2: 5' CACCGAGCCACTGCCTAAACACCTG 3' ex8

Rescue experiments were performed by transfecting clonal B16F1 CRTC3 KO cells with pSelect-puro-mcs plasmid (psetp\_mcs, Invivogen) carrying full length CRTC3, CRTC2, OCA2, CRTC3-Ser<sup>391</sup>A or CRTC2/3 hybrid constructs (CRTC2<sub>328-449</sub> exchanged for CRTC3<sub>326-402</sub>, as previously described<sup>47</sup>), cloned into SalI and NheI sites. Transfected cells were selected with 2μg/ml puromycin for at least 7 days before initial testing. Empty vector was used to select for CTRL cells. Sequences of oligonucleotides used for cloning:

CRTC2 F: 5' GATGGTCGACATGGCGACGTCAGGGGCGAACGGGCCGGGTTCC 3'

CRTC2 R: 5' CATGCTAGCTCACTGTAGCCGATCACTACGGAATGAGTCCTC 3'

CRTC3 F: 5' GATGGTCGACATGGCCGCCTCGCCCGGTTTCGGGCAGCGCCAAC 3'

CRTC3 R: 5' CATGCTAGCTCATAGCCGGTCAGCTCGAAACGTCTCCTCCAC 3'

OCA2 F: 5' GATGGTCGACATGCGCCTAGAGAACAAAGACATCAGGC 3'

OCA2 R: 5' CATGCTAGCTTAATTCCATCCCACCACAATGTGAGCAATCAGG 3'

Site directed mutagenesis of CRTC3-Ser391 to Ala residue was performed from pSelect-puro-mcs-CRTC3 construct with oligonucleotides:

S391A\_F: 5' GGCGCAGGCAGCCTCCAGTCGCCCCTCTCACGCTCTCTCCTGG 3'

S391A\_R: 5' CCAGGAGAGAGCGTGAGAGGGGCGACTGGAGGCTGCCTGCGCC 3'

Q5 high fidelity polymerase (M0492S, New England Biolabs) was used for the PCR reaction (95°C 3min, 95°C 30sec, 55°C 1min, 72°C for 7min, 18 cycles, 72°C for 7min final extension). Template plasmid was digested with DpnI for 2h at 37°C before amplification in Top10 competent cells (Invitrogen). Presence of S<sup>391</sup>A mutation was confirmed by sequencing.

CRTC3 knock-out and single cell selection in A375 cells was performed with the same CRISPR protocol used for B16F1 cells. The gRNAs targeted exons 1 and 11 of human CRTC3:

hC3g1: 5' CACCGTGAGCGGCCCGTCTCGGCGT 3' ex11

hC3g2: 5' CACCGCGCGCTGCACACGCAGAGAC 3' ex1

### **Melanin quantification**

1.5 µg of dorsal hair was plucked from 8 weeks old WT and CRTC3 KO animals (N=3 for each group) and solubilized in 1ml of 1M NaOH at 85°C for 4h under agitation. Samples were centrifuged at 12000 rpm for 5 minutes and the absorbance of supernatants was read at 475nm in the Synergy-H1 microplate reader (BioTek). Absorbance values were compared to the standard curve of synthetic melanin (155343, MP Biomedicals) dissolved in 1M NaOH. The standard curve was in a linear range of the experimental values.

For extracellular melanin quantification, B16F1 cells were plated in 6-well dishes at the density of 0.5x10<sup>6</sup> cells/well in phenol red-free media and treated with FSK (F6886, Sigma) or IBMX (I5879, Sigma) for 60h, 24h after seeding. Final concentrations of small molecules used for treatment are indicated in figure legends. Melanin in the collected medium was determined by comparison of

experimental absorbance values at 405nm with synthetic melanin standard curve diluted in the same media.

### **Transmission Electron Microscopy (TEM)**

B16F1 cells were fixed in a solution of 2% paraformaldehyde, 2.5% glutaraldehyde, and 2mM CaCl<sub>2</sub> in 0.1M sodium cacodylate buffer (pH 7.4) for 2 h at room temperature, post-fixed in 1% osmium tetroxide for 40 and 1.5% potassium ferrocyanide in sodium cacodylate buffer for 1 hour at 4°C in the dark, stained in 1% aqueous uranyl acetate at 4°C in the dark, dehydrated in ethanol graded series, and embedded in Eponate12 resin (Ted Pella). Ultra-thin sections of 70 nm were obtained using a diamond knife (Diatome) in an ultramicrotome (Leica EM UC7) and placed on copper grids (300 mesh). Sections were imaged on Zeiss TEM Model Libra 120, operated at 120 kV and captured as 2048 x 2040 pixel tiffs using a Zemas camera system.

### **Tyrosinase activity**

B16F1 cells were plated in 6-well dishes at a density of 0.5x10<sup>6</sup> cells/well and treated with FSK for 48h, 24h after seeding. Cells were lysed in 100 µl of 50 mM sodium phosphate buffer (pH 6.8) containing 1% Triton X-100 and 0.1 mM phenylmethylsulfonyl fluoride (PMSF, Thermo Fisher) and frozen at -80°C for 30 min. Thawed cellular extracts were centrifuged at 12,000g for 30 min at 4°C. For whole lysate activity, supernatants (80 µl) and 20 µl of 3,4-Dihydroxy-L-phenylalanine (L-DOPA, 2 mg/ml freshly dissolved in 50mM sodium phosphate buffer) were placed in a 96-well plate, and the absorbance at 492 nm was read every 10 min for 1 h at 37 °C using the Synergy-H1 plate reader. For in-gel activity, protein concentration of cell lysates was determined by micro BCA assay (Pierce), equal protein amounts were mixed with Laemmli sample buffer without β-mercaptoethanol and incubated at 37°C for 15 min with slight agitation. Proteins were resolved on 8% sodium-dodecyl-sulfate (SDS)-acrylamide gel by electrophoresis. Gels were equilibrated in 50 mM sodium phosphate buffer (pH 6.8) for 1h before adding 1mg/ml L-DOPA. Further incubation was monitored until clear colorimetric detection of tyrosinase activity. L-DOPA was obtained from Tocris Bioscience (3788).

### **OCA2 antibody production**

Female New Zealand white rabbits (10-12 weeks old; I.F.P.S. Inc., Norco, California, USA) were used for mOCA2 antibody production as previously described<sup>47</sup>. OCA2 synthetic peptide (Cys<sup>27</sup> mOCA2(2-27)-NH<sub>2</sub>) was synthesized by RS Synthesis (Louisville, KY) and conjugated to maleimide activated Keyhole Limpet Hemocyanin (KLH) per manufacturer's instructions (77610, Thermo Fisher). Antisera with highest titers against the synthetic peptides were tested for the ability to recognize endogenous OCA2 in B16F1 cell line and primary mouse melanocytes. Rabbit PBL #7431 anti-mOCA2 was purified using Cys<sup>27</sup> mOCA2(2-27)-NH<sub>2</sub> covalently attached to Sulfolink agarose (20401, Thermo Fisher). Validation of the purified antibody is available in Suppl. Fig. 2a-d.

### **Soft agar, migration and invasion assays**

Soft agar assays were carried out as previously described<sup>60</sup>. Briefly, 6-well dishes were coated with 0.5% noble agar in DMEM media and cells were seeded at  $3 \times 10^4$  cells/well in DMEM containing 0.3% noble agar and 10% FBS. Cells were allowed to form colonies for 28 days and were subsequently imaged on Zeiss VivaTome microscope. Diameters of imaged colonies were measured using ImageJ. For comparison between B16F1 KO cells carrying full length CRTC3 or CRTC3-S<sup>391</sup>A constructs, cells were subjected to initial 7 day selection with 2 $\mu$ g/ml puromycin and tested for comparable expression of CRTC3. Puromycin was also added to noble agar layers in these experiments. For migration and invasion assays, A375 cells were grown in serum-free DMEM media for 24h prior to seeding into 24-well permeable 8 $\mu$ M pore PET transwell inserts, with or without Matrigel coating (Corning 353097 and 354480, respectively). Inserts and companion plates were equilibrated in serum-free media at 37°C in 5% CO<sub>2</sub> for at least 2h before starting the experiments.  $3-7 \times 10^4$  cells in serum-free media were added to the transwell inserts and 2% FBS was used as chemotactic agent in the bottom well. For certain experiments, cAMP elevating compounds were mixed with cells prior to seeding with concentrations indicated in Figures and Legends. Cells were allowed to migrate for 24h or invade for 72h. Transwell membranes containing migrating/invading cells were fixed in 3.7% paraformaldehyde for 2 min at RT, permeabilized in methanol for 15 min at RT and stained with a solution of 0.2% crystal violet/20% methanol for 20 min in the dark. Non-migrating cells were removed from the inside of



membranes by swabbing with cotton tips before imaging on Zeiss VivaTome microscope. Cells were counted with ImageJ.

### **cAMP Measurement**

B16F1 or A375 cells were plated at  $0.5 \times 10^6$  cells/well in 6-well dishes and treated with cAMP inducing compounds for 15min, 24h after seeding. Different compounds and concentrations are indicated in Figures and Legends. Cellular cAMP levels were measured using an ELISA kit (581001, Cayman Chemical Company) according to manufacturer's instructions.

### **Immunofluorescence**

HEK 293T and A375 cells were plated in Poly-D-Lysine coated glass bottom dishes (P35GC-0-10-C, MatTek Corporation). 24h post seeding, cells were fixed with 4% paraformaldehyde. After incubation with the primary hCRTC3(414-432) (PBL #7019) antibody, microscopy samples were incubated with secondary antibodies conjugated with Alexa Fluor®-568 (goat anti-rabbit). Counterstaining with DAPI (14285, Cayman Chemical Company) was performed before image acquisition (LSM 710, Zeiss).

### **Real time qRT-PCR analysis**

RNA was extracted from cultured cells, sorted primary melanoblasts or whole skin with TRIzol (15596026, Invitrogen)-chloroform. Skin samples were weighted, frozen in liquid nitrogen and equal amounts of frozen tissue were ground with mortar and pestle before extracting RNAs in TRIzol. RNA extracts were further purified and DNase treated by using RNAeasy Qiagen columns (DNase 79254, Qiagen). cDNA was synthesized from 400 ng (melanoblasts) or 1µg (cell lines and tissues) input RNA using Transcriptor first-strand cDNA synthesis kit (04897030001, Roche) according to the manufacturer's instructions. Quantitative PCR was performed using LightCycler 480 SYBR green I master mix (04887352001, Roche) in a LightCycler 480 II (Roche). Relative mRNA levels were calculated using the  $2^{-\Delta\Delta C_t}$  method, normalized to L32. Primer sequences:

RPL32: F 5' TCTGGTGAAGCCCAAGATCG 3' R: 5' CTCTGGGTTTCCGCCAGTT 3'

MITF: F 5' GACTAAGTGGTCTGCGGTGT 3' R: 5' CTGGTAGTGACTGTATTCTA 3'

TYR: F 5' TGGACAAAGACGACTACCACA 3' R: 5' TTTTCAGTCCCCTCTGTTTCC 3'

TYRP1: F: 5' GGCATCAGGGGAAAAGCAGA 3' R: 5' GCTCAGATGAAAATACAGCAGTACC 3'

DCT: F: 5' AACAGACACCAGACCCTGGA 3' R: 5' AAGTTTCCTGTGCATTTGCATGT 3'

PMEL: F: 5' ACTGCCAGCTGGTTCTACAC 3' R: 5' CACCGTCTTGACCAGGAACA 3'

MLANA: F: 5' GTGTTCTCTCGGGGAAGGTGT 3' R: 5' CAGCAGTGACATAGGAGCGT 3'

OCA2: F: 5' ATAGTGAGCAGGGAGGCTGT 3' R: 5' ACTGATGGGCCAGCAAAAAGA 3'

COL11A1: F: 5' CGATGGATTCCCGTTCGAGT 3' R: 5' GAGGCCTCGGTGGACATTAG 3'

S100A4: F: 5' CCTCTCTCTTGGTCTGGTCTC 3' R: 5' GTCACCCTCTTTGCCTGAGT 3'

### **Proliferation and viability assays**

Cells were seeded in white 96-well plates with clear bottom (6005181, PerkinElmer) at 3500 cells/well and cell proliferation over 3-5 day periods was determined by measuring luminescence with CellTiter-Glo® assay kit (G7570, Promega), according to manufacturer's instructions. For experiments measuring A375 cell viability after CRT3 over-expression and treatment with inhibitors,  $1 \times 10^6$  cells (grown in 6-well dishes) were subjected to nucleofection with Amaxa® Cell Line Nucleofector® kit V (VCA-1003, Lonza), following the manufacturer's protocol. Total of 2µg pSelect-puro-CRT3 or empty vector were used per well. Cells were treated with 5µM vemurafenib (PLX4032, RG7204, S1267, Selleckchem) or 20µM cisplatin (S1166, Selleckchem) for 72h, 24h post nucleofection. Prior to experiments, cells were tested for sensitivity to vemurafenib and cisplatin (inhibitor range 0-20µM) and  $IC_{50}$  determined to be 0.0829µM and 6.99µM, respectively.

### **Sub-cellular fractionation and western blotting**

Cells were grown to 65% confluency on 10cm dishes, treated with compounds indicated and fractionated using Calbiochem® fractionation kit (539790), according to the manufacturer's instructions. For some fractionation experiments a previously described protocol<sup>61</sup> was used with some modifications. Briefly, cells were treated with indicated compounds for 20min, washed and scraped in cold phosphate-buffered saline (PBS), resuspended in buffer A (10mM HEPES-KOH pH 7.4, 1.5mM

MgCl<sub>2</sub>, 10mM KCl, 0.2mM PMSF, protease inhibitor cocktail (P9599, Sigma), phosphatase inhibitors 2 and 3 (P5726 and P0044, Sigma), 0.1% NP-40) and allowed to swell on ice for 10min. Cell swelling was monitored through light microscope visualization. Cells were spun and supernatant used as cytosolic fraction. Nuclear proteins were extracted in high salt buffer C (20mM HEPES-KOH pH 7.9, 25% glycerol, 420mM NaCl, 1.5mM MgCl<sub>2</sub>, 0.2mM EDTA, 0.2mM PMSF, protease inhibitor cocktail, phosphatase inhibitors 2 and 3) for 20min on ice. Compounds used for cell treatments in these experiments were SCF (S9915, Sigma), HGF (H9661, Sigma), FSK (F6886; Sigma) and IBMX (I5879, Sigma). Whole cell or tissue extracts were prepared by collecting the samples in KB (Killer buffer, 2M urea, 4% sucrose, 5% SDS, 1mM EDTA, protease inhibitor cocktail, phosphatase inhibitors 2 and 3) and then passing through Qiashredder columns (79656, Qiagen). Tissue samples were weighted, frozen in liquid nitrogen and ground using mortar and pestle before lysis. Protein concentrations were determined with Pierce micro BCA protein assay kit (23235, Thermo Fisher). Samples were resolved by SDS-polyacrylamide gel electrophoresis and transferred onto PVDF membranes (IPVH00010, Millipore). Membranes were blocked in 5% milk before adding antibodies of interest. HyGlo HRP detection kit (E2500, Denville) was used to visualize proteins.

### Luciferase assays

OCA2 enhancer region was cloned from mouse genomic DNA into KpnI and XhoI sites of the pGL3 promoter vector (E1751, Promega). MITF proximal promoter was cloned into SacI and HindIII sites of the PGL4 promoter vector (E6651, Promega). EVX\_2xCRE promoter cloned into PGL4<sup>55</sup> was used to measure transcriptional activity of CRTC3 mutations found in melanoma patients. Mutations in CRE, E-box sites and CRTC3 were produced *via* site-directed mutagenesis. All constructs were sequenced to confirm the presence of mutations. Cells were seeded in 24-well dishes at 0.03x10<sup>6</sup> cells/well and transfected with reporter constructs 24h post seeding, using Lipofectamine 2000 (11668019, Invitrogen) according to the manufacturer's instructions. Total of 400ng of DNA was added in each well. In the case of CRTC3 melanoma mutations, EVX and pSelect\_CRTC3 constructs were co-transfected at 200ng DNA each. Expression of CRTC3 constructs was visualized *via* western blotting and was used to normalize activity. Media was changed 24h after transfection. Various treatments that the cells were

subjected to 48h after transfection are indicated in respective Figures and Legends. Cells were lysed in luciferase extraction buffer (25mM Gly-Gly, 15mM MgSO<sub>4</sub>, 4mM EGTA, 1mM DTT, 1% Triton X-100). 50µl of extract was added to 50µl of assay buffer (25mM Gly-Gly, 15mM MgSO<sub>4</sub>, 4mM EGTA, 15mM K<sub>2</sub>HPO<sub>4</sub>, pH 7.8, 2mM DTT, 2.5mM ATP) and 50µl of 0.1mM D-luciferin K<sup>+</sup> salt before measuring luminescence in a GloMax® multi microplate reader (Promega).

Oligonucleotides used for cloning:

MITFprom\_F: 5'CATGAGCTCAGACTCGGGTGCAAGATGAAG 3'

MITFprom\_R: 5'GTGAAGCTTAGCAAGGTTTCAGGCAGCCCC 3'

OCA2Enh\_F: 5'GATGGGTACCCAGTCCATTTCTGAATCAACAC 3'

OCA2Enh\_R: 5' CATCTCGAGCCAGTGAGACTCCTGGCTCCAAG 3'

Oligonucleotides used for site-directed mutagenesis:

MITFprom\_CRE\_F: 5'TATCTATGAAAAAAGCATGAAATCAAGCCAGCAGGGAAACTGATATC 3'

OCA2Enh\_CRE1\_F: 5' ATCCTGATGGTGATTACATGAAAAGAGTTTTTTTTTTCTG 3'

OCA2Enh\_CRE2\_F: 5' TTATTTCACCTTGATGAAAAGCATTTTAAAGTTTAC 3'

OCA2Enh\_EBOX\_F: 5' CTGAACCTTTGTATTAACAATTGATTTTTATCCTGATGGTGAT 3'

CRTC3-P142S\_F: 5' GAGCTGGCCACGGCAACAGTCTCCTTGGAAGAAGAGAAGCA 3'

CRTC3-L166F\_F: 5' GGACCAATTCTGATTCTGCTTTTCACACGAGTGCTCTGAGCACC 3'

CRTC3-H315N\_F: 5' CAACCTTCCAGCTGCCATGACTAACCTGGGGATAAGAACCTCCTC 3'

CRTC3-P331H\_F: 5' CTCCAAAGTTCTCGAAGTAACCATCCATCCAAGCCACACTCAGT 3'

CRTC3-S368F\_F: 5' CACCCCTCCCTCCGGCTCTTCTTCCTTAGCAACCCGTCTCTTTCC 3'

CRTC3-P419S\_F: 5' GACCAGCCCACTGAACCCGTATTCTGCCTCCCAGATGGTGACCTCA 3'

### **Chromatin immunoprecipitation and sequencing (ChIP-seq)**

ChIP was performed as previously described<sup>62</sup>. Briefly, cells were grown to 80% confluency in 150mm dishes (one per IP), treated with DMSO or 5µM FSK for 30min, fixed in 1% formaldehyde for 10min and quenched with 125mM glycine for 5min. Cells were washed and scraped in ice-cold phosphate-buffered saline (PBS) and then resuspended in buffer LB3 (10mM Tris-HCl (pH 8.0), 100mM NaCl,

1mM EDTA, 0.5mM EGTA, 0.1% Na-deoxycholate, 0.5% N-laurylsarcosine, protease inhibitor cocktail). Resuspended cells were mixed with 100mg glass beads and sonicated (Virtis Virsonic 100 sonicator) at power 9 for 9 pulses (20sec on, 1min off on ice). Sonication testing was performed before every ChIP experiment to determine the optimal shearing conditions. After sonication, 1% final Triton X-100 was added and the extract clarified by centrifugation at  $17,000 \times g$  for 5 min. Thirty microliters of protein A-agarose beads (20333, Thermo Scientific) were prepared for IP by washing in LB3 buffer, then washing twice with PBS/0.5% bovine serum albumin (BSA) and incubating with 5 $\mu$ g antibody in PBS/0.5% BSA for 3h at 4°C with rotation. For ChIP, beads were washed once in PBS/0.5% BSA and 500 $\mu$ l of clarified extract was added to antibody-coupled beads and incubated overnight at 4°C with rotation.

Beads were washed 3 times in 500 $\mu$ l wash buffer 1 (20mM Tris-HCl pH 7.4, 150mM NaCl, 2mM EDTA, 0.1% SDS, 1% Triton X-100) and three times in wash buffer 2 (20mM Tris-HCl (pH 7.4), 250mM LiCl, 1mM EDTA, 1% Triton X-100, 0.7% Na-deoxycholate). Elution was then performed by incubating beads in 50 $\mu$ l elution buffer 1 (Tris-EDTA, 1% SDS) for 15min at 50°C and 45 $\mu$ l elution buffer 2 (TE, 1% SDS, 300 mM NaCl) for 15min at 50°C with shaking. Both elutions were combined and cross-links reversed overnight at 65°C with shaking. Samples were incubated with RNase A for 1h at 37°C and proteinase K for 1h at 50°C. ChIP DNA was purified using Agencourt AMPure XP beads (A63881, Beckman Coulter) and DNA amounts determined by Qubit® 2.0 fluorometer (Invitrogen). All samples had more than 0.5ng/ $\mu$ l DNA, which was considered as the cutoff to proceed to library preparation. Libraries were prepared with NebNext® ChIP seq reagents for Illumina (E6240 and E7335, New England Biolabs), following the manufacturer's protocol. High-throughput sequencing was performed on the HiSeq 2500 system (Illumina) at a run configuration of single read 50 bases. Image analysis and base calling were done with Illumina CASAVA-1.8.2.on HiSeq 2500 system and sequenced reads were quality-tested using FASTQC.

### **ChIP-seq analysis.**

Reads were aligned to the mouse (mm10) genomes using STAR<sup>63</sup>. Tag directories of uniquely mapped reads were generated with HOMER and peaks were called and annotated using HOMER (findPeaks in

“factor” mode for CREB, CRTC2, CRTC3, POLII and MITF and in “histone” mode for H3AcK27; annotatePeaks.pl, default parameters). Motif enrichment near ChIP-seq peaks was performed with HOMER using findMotifsGenome.pl. Overlapping peaks were visualized by generating BigWig files with HOMER (makeMultiWigHub.pl, default parameters) and uploading the hubs in the UCSC Genome Browser (<http://genome.ucsc.edu>). Enrichment analysis was preformed using WebGestalt<sup>64</sup>.

### **RNA-sequencing and analysis.**

RNAs were prepared as indicated in RT-qPCR protocol. The quality of the isolated total RNA was assessed using the Tape Station 4200 and RNA-seq libraries were prepared using the TruSeq stranded mRNA Sample Preparation Kit v2 (RS-122-2001) according to Illumina protocols. RNA-seq libraries were multiplexed, normalized and pooled for sequencing. High-throughput sequencing was performed on the HiSeq 2500 system (Illumina) at a run configuration of single read 50 bases. Image analysis and base calling were done with Illumina CASAVA-1.8.2.on HiSeq 2500 system and sequenced reads were quality-tested using FASTQC. FASTQ files were aligned to the mouse mm10 or human hg19 genome builds using STAR<sup>63</sup>. Independent biological replicates (2 for CTRL and CRTC3 KO B16F1 and A375 cell line samples, 1 for CRTC3 rescue sample in B16F1 cells, 4 for WT and CRTC3 KO skin samples) were used for differential expression analysis with HOMER (analyzeRepeats.pl with option –raw; getDiffExpression.pl using DESeq2<sup>65</sup>). Expression was compared between vehicle and FSK treatment or CTRL and KO genomes and differentially expressed genes were defined as having Log<sub>2</sub> fold change of  $\geq 1$  or  $\leq -1$  (1.3 and -1.3 for whole skin samples) and an adjusted p-value of  $\leq 0.05$ . Rescued genes were defined with a Log<sub>2</sub> fold change of  $\geq 0.58$  or  $\leq -0.58$  with respect to their relative KO values. Enrichment analysis was preformed using WebGestalt<sup>64</sup>. Heat maps were generated with Cluster 3.0<sup>66</sup> and Java TreeView (version 1.1.6r4)<sup>67</sup>.

### **Data availability**

Sequencing data sets are found under GEO accession number GSE154117.

## Antibodies

Rabbit anti-CREB serum (244, in-house), rabbit anti-CRTC1 (C71D11, 2587, CST), rabbit anti-CRTC2 serum (6865, in-house), rabbit anti-CRTC3 (C35G4, 2720, CST), rabbit anti-CRTC3-pSer<sup>391</sup> (PBL #7408, in-house<sup>47</sup>), rabbit-anti-hCRTC3 (PBL #7019, in-house<sup>47</sup>), rabbit anti-mOCA2 (PBL #7431, in-house, this work), rabbit anti-H3AcK27 (ab4729, Abcam), Anti-RNA polymerase II (CTD repeat YSPTSPS (phospho S2) antibody - ChIP Grade (ab5095)), mouse anti-Tubulin (05-829; EMD Millipore), mouse anti-MITF (clone C5, MAB3747-1 Millipore; MITF ChIP grade ab12039 Abcam), rabbit anti-TYR (ab61284, Abcam), rabbit anti-DCT (ab74073, Abcam), rabbit anti-MLANA (NBP254568H, Novus), rabbit anti-PMEL (ab137078, Abcam) rabbit anti-ERK1/2 (4695, CST), rabbit anti-pERK1/2 (9101, CST), mouse anti-HSP90 $\alpha/\beta$  (SC-13119, Santa Cruz Biotechnology), rabbit anti-Histone H3 (9715, CST).

## Acknowledgements

This work was supported by NIH grant R01 DK083834, the Leona M. and Harry B. Helmsley Charitable Trust, the Clayton Foundation for Medical Research and the Salkexcellerator Fund. We acknowledge the core facilities of the Salk Institute: Flow Cytometry Core Facility with funding from NIH-NCI CCSG: P30 014195 and Shared Instrumentation Grant S10-OD023689 (Aria Fusion cell sorter), the Waitt Advanced Biophotonics Core Facility with funding from NIH-NCI CCSG: P30 014195 and the Waitt Foundation and the NGS Core Facility of the Salk Institute with funding from NIH-NCI CCSG: P30 014195, the Chapman Foundation and the Helmsley Charitable Trust.

## Author contributions

J.O. conceived the study, designed and performed experiments, analyzed data, and wrote the manuscript. T.S. performed IF experiments, analyzed data and provided reagents. N.N. provided experimental technical support under J.O. supervision. J.M.V. generated antisera for m-OCA2 (PBL #7431). M.S. provided suggestions and feedback for RNA-seq analysis. M.M. conceived the study, provided feedback and reviewed/edited the manuscript.

## Competing interest statement

The authors declare no competing interests.

## References

1. Scherer, D. & Kumar, R. Genetics of pigmentation in skin cancer — A review. *Mutat. Res. Mutat. Res.* **705**, 141–153 (2010).
2. Fernandez, L. P. *et al.* Pigmentation-related genes and their implication in malignant melanoma susceptibility. *Exp. Dermatol.* **18**, 634–642 (2009).
3. Abdel-Malek, Z. A. *et al.* Melanocortins and the melanocortin 1 receptor, moving translationally towards melanoma prevention. *Arch. Biochem. Biophys.* **563**, 4–12 (2014).
4. Shannan, B., Perego, M., Somasundaram, R. & Herlyn, M. Heterogeneity in Melanoma. *Cancer Treat. Res.* **167**, 1–15 (2016).
5. Vandamme, N. & Berx, G. Melanoma Cells Revive an Embryonic Transcriptional Network to Dictate Phenotypic Heterogeneity. *Front. Oncol.* **4**, (2014).
6. Reuben, A. *et al.* Genomic and immune heterogeneity are associated with differential responses to therapy in melanoma. *NPJ Genomic Med.* **2**, (2017).
7. Kozar, I., Margue, C., Rothengatter, S., Haan, C. & Kreis, S. Many ways to resistance: How melanoma cells evade targeted therapies. *Biochim. Biophys. Acta BBA - Rev. Cancer* **1871**, 313–322 (2019).
8. Wolf Horrell, E. M., Boulanger, M. C. & D’Orazio, J. A. Melanocortin 1 Receptor: Structure, Function, and Regulation. *Front. Genet.* **7**, (2016).
9. Sánchez-Más, J., Hahmann, C., Gerritsen, I., García-Borrón, J. C. & Jiménez-Cervantes, C. Agonist-independent, high constitutive activity of the human melanocortin 1 receptor. *Pigment Cell Res.* **17**, 386–395 (2004).
10. Cui, R. *et al.* Central role of p53 in the suntan response and pathologic hyperpigmentation. *Cell* **128**, 853–864 (2007).
11. Levy, C., Khaled, M. & Fisher, D. E. MITF: master regulator of melanocyte development and melanoma oncogene. *Trends Mol. Med.* **12**, 406–414 (2006).
12. Buscà, R. & Ballotti, R. Cyclic AMP a key messenger in the regulation of skin pigmentation. *Pigment Cell Res.* **13**, 60–69 (2000).
13. Bertolotto, C. *et al.* Microphthalmia Gene Product as a Signal Transducer in cAMP-Induced Differentiation of Melanocytes. *J. Cell Biol.* **142**, 827–835 (1998).
14. Wellbrock, C. & Arozarena, I. Microphthalmia-associated transcription factor in melanoma development and MAP-kinase pathway targeted therapy. *Pigment Cell Melanoma Res.* **28**, 390–406 (2015).



15. Price, E. R. *et al.* Lineage-specific Signaling in Melanocytes c-Kit stimulation recruits p300/CBP to microphthalmia. *J. Biol. Chem.* **273**, 17983–17986 (1998).
16. Hemesath, T. J., Price, E. R., Takemoto, C., Badalian, T. & Fisher, D. E. MAP kinase links the transcription factor Microphthalmia to c-Kit signalling in melanocytes. *Nature* **391**, 298–301 (1998).
17. Wu, M. *et al.* c-Kit triggers dual phosphorylations, which couple activation and degradation of the essential melanocyte factor Mi. *Genes Dev.* **14**, 301–312 (2000).
18. Herraiz, C. *et al.* Signaling from the human melanocortin 1 receptor to ERK1 and ERK2 mitogen-activated protein kinases involves transactivation of cKIT. *Mol. Endocrinol. Baltim. Md* **25**, 138–156 (2011).
19. Buscà, R. *et al.* Ras mediates the cAMP-dependent activation of extracellular signal-regulated kinases (ERKs) in melanocytes. *EMBO J.* **19**, 2900–2910 (2000).
20. Niwano, T., Terazawa, S., Nakajima, H. & Imokawa, G. The stem cell factor-stimulated melanogenesis in human melanocytes can be abrogated by interrupting the phosphorylation of MSK1: evidence for involvement of the p38/MSK1/CREB/MITF axis. *Arch. Dermatol. Res.* **310**, 187–196 (2018).
21. Dumaz, N. *et al.* In melanoma, RAS mutations are accompanied by switching signaling from BRAF to CRAF and disrupted cyclic AMP signaling. *Cancer Res.* **66**, 9483–9491 (2006).
22. Wellbrock, C. & Arozarena, I. The Complexity of the ERK/MAP-Kinase Pathway and the Treatment of Melanoma Skin Cancer. *Front. Cell Dev. Biol.* **4**, 33 (2016).
23. Johannessen, C. M. *et al.* A melanocyte lineage program confers resistance to MAP kinase pathway inhibition. *Nature* **504**, 138–142 (2013).
24. Altarejos, J. Y. & Montminy, M. CREB and the CRTC co-activators: sensors for hormonal and metabolic signals. *Nat. Rev. Mol. Cell Biol.* **12**, 141–151 (2011).
25. Altarejos, J. Y. *et al.* The Creb1 coactivator Crtc1 is required for energy balance and fertility. *Nat. Med.* **14**, 1112–1117 (2008).
26. Blanchet, E. *et al.* Feedback inhibition of CREB signaling promotes beta cell dysfunction in insulin resistance. *Cell Rep.* **10**, 1149–1157 (2015).
27. Song, Y. *et al.* CRTC3 links catecholamine signalling to energy balance. *Nature* **468**, 933–939 (2010).
28. MacKenzie, K. F. *et al.* PGE(2) induces macrophage IL-10 production and a regulatory-like phenotype via a protein kinase A-SIK-CRTC3 pathway. *J. Immunol. Baltim. Md 1950* **190**, 565–577 (2013).
29. Bang, S. *et al.* Novel regulation of melanogenesis by adiponectin via the AMPK/CRTC pathway. *Pigment Cell Melanoma Res.* **30**, 553–557 (2017).
30. Yun, C.-Y. *et al.* Nuclear Entry of CRTC1 as Druggable Target of Acquired Pigmentary Disorder. *Theranostics* **9**, 646–660 (2019).

31. Kim, Y.-H. *et al.* Therapeutic Potential of Rottlerin for Skin Hyperpigmentary Disorders by Inhibiting the Transcriptional Activity of CREB-Regulated Transcription Coactivators. *J. Invest. Dermatol.* **139**, 2359–2367.e2 (2019).
32. Kim, J.-H. *et al.* JNK suppresses melanogenesis by interfering with CREB-regulated transcription coactivator 3-dependent MITF expression. *Theranostics* **10**, 4017–4029 (2020).
33. Bellono, N. W., Escobar, I. E., Lefkovith, A. J., Marks, M. S. & Oancea, E. An intracellular anion channel critical for pigmentation. *eLife* **3**, e04543 (2014).
34. Park, S. *et al.* Unrevealing the role of P-protein on melanosome biology and structure, using siRNA-mediated down regulation of OCA2. *Mol. Cell. Biochem.* **403**, 61–71 (2015).
35. Jannot, A.-S. *et al.* Allele variations in the OCA2 gene (pink-eyed-dilution locus) are associated with genetic susceptibility to melanoma. *Eur. J. Hum. Genet.* **13**, 913–920 (2005).
36. Sturm, R. A. *et al.* A Single SNP in an Evolutionary Conserved Region within Intron 86 of the HERC2 Gene Determines Human Blue-Brown Eye Color. *Am. J. Hum. Genet.* **82**, 424–431 (2008).
37. Duffy, D. L. *et al.* Multiple Pigmentation Gene Polymorphisms Account for a Substantial Proportion of Risk of Cutaneous Malignant Melanoma. *J. Invest. Dermatol.* **130**, 520–528 (2010).
38. Donnelly, M. P. *et al.* A global view of the OCA2-HERC2 region and pigmentation. *Hum. Genet.* **131**, 683–696 (2012).
39. Hawkes, J. E. *et al.* Report of a Novel OCA2 Gene Mutation and an Investigation of Two OCA2 Variants on Melanoma Predisposition in a Familial Melanoma Pedigree. *J. Dermatol. Sci.* **69**, 30–37 (2013).
40. Steel, K. P., Davidson, D. R. & Jackson, I. J. TRP-2/DT, a new early melanoblast marker, shows that steel growth factor (c-kit ligand) is a survival factor. *Dev. Camb. Engl.* **115**, 1111–1119 (1992).
41. Zaidi, M. R., Hornyak, T. J. & Merlino, G. A genetically engineered mouse model with inducible GFP expression in melanocytes. *Pigment Cell Melanoma Res.* **24**, 393–394 (2011).
42. Guyonneau, L., Murisier, F., Rossier, A., Moulin, A. & Beermann, F. Melanocytes and pigmentation are affected in dopachrome tautomerase knockout mice. *Mol. Cell. Biol.* **24**, 3396–3403 (2004).
43. Bennett, D. C. Mechanisms of differentiation in melanoma cells and melanocytes. *Environ. Health Perspect.* **80**, 49–59 (1989).
44. Watabe, H. *et al.* Regulation of Tyrosinase Processing and Trafficking by Organellar pH and by Proteasome Activity. *J. Biol. Chem.* **279**, 7971–7981 (2004).
45. Visser, M., Kayser, M. & Palstra, R.-J. HERC2 rs12913832 modulates human pigmentation by attenuating chromatin-loop formation between a long-range enhancer and the OCA2 promoter. *Genome Res.* **22**, 446–455 (2012).

46. Visser, M., Kayser, M., Grosveld, F. & Palstra, R.-J. Genetic variation in regulatory DNA elements: the case of OCA2 transcriptional regulation. *Pigment Cell Melanoma Res.* **27**, 169–177 (2014).
47. Sonntag, T. *et al.* Mitogenic Signals Stimulate the CREB Coactivator CRTC3 through PP2A Recruitment. *iScience* **11**, 134–145 (2019).
48. Cancer Genome Atlas Network. Genomic Classification of Cutaneous Melanoma. *Cell* **161**, 1681–1696 (2015).
49. Delyon, J. *et al.* PDE4D promotes FAK-mediated cell invasion in BRAF-mutated melanoma. *Oncogene* **36**, 3252–3262 (2017).
50. Marquette, A., André, J., Bagot, M., Bensussan, A. & Dumaz, N. ERK and PDE4 cooperate to induce RAF isoform switching in melanoma. *Nat. Struct. Mol. Biol.* **18**, 584–591 (2011).
51. Watanabe, Y. *et al.* Phosphodiesterase 4 regulates the migration of B16-F10 melanoma cells. *Exp. Ther. Med.* **4**, 205–210 (2012).
52. Howe, A. K. Regulation of actin-based cell migration by cAMP/PKA. *Biochim. Biophys. Acta* **1692**, 159–174 (2004).
53. Gonzalez-Perez, A. *et al.* IntOGen-mutations identifies cancer drivers across tumor types. *Nat. Methods* **10**, 1081–1082 (2013).
54. Tate, J. G. *et al.* COSMIC: the Catalogue Of Somatic Mutations In Cancer. *Nucleic Acids Res.* **47**, D941–D947 (2019).
55. Sonntag, T. *et al.* Analysis of a cAMP regulated coactivator family reveals an alternative phosphorylation motif for AMPK family members. *PLoS ONE* **12**, (2017).
56. Hendriks, I. A. *et al.* Site-specific mapping of the human SUMO proteome reveals co-modification with phosphorylation. *Nat. Struct. Mol. Biol.* **24**, 325–336 (2017).
57. Wang, Y. *et al.* Targeted disruption of the CREB coactivator Crtc2 increases insulin sensitivity. *Proc. Natl. Acad. Sci. U. S. A.* **107**, 3087–3092 (2010).
58. Godwin, L. S. *et al.* Isolation, culture, and transfection of melanocytes. *Curr. Protoc. Cell Biol.* **63**, 1.8.1-20 (2014).
59. Ran, F. A. *et al.* Genome engineering using the CRISPR-Cas9 system. *Nat. Protoc.* **8**, 2281–2308 (2013).
60. Borowicz, S. *et al.* The Soft Agar Colony Formation Assay. *JoVE J. Vis. Exp.* e51998 (2014) doi:10.3791/51998.
61. Andrews, N. C. & Faller, D. V. A rapid micropreparation technique for extraction of DNA-binding proteins from limiting numbers of mammalian cells. *Nucleic Acids Res.* **19**, 2499 (1991).
62. Van de Velde, S. *et al.* CREB Promotes Beta Cell Gene Expression by Targeting Its Coactivators to Tissue-Specific Enhancers. *Mol. Cell. Biol.* **39**, (2019).
63. Dobin, A. *et al.* STAR: ultrafast universal RNA-seq aligner. *Bioinforma. Oxf. Engl.* **29**, 15–21 (2013).

64. Liao, Y., Wang, J., Jaehnig, E. J., Shi, Z. & Zhang, B. WebGestalt 2019: gene set analysis toolkit with revamped UIs and APIs. *Nucleic Acids Res.* **47**, W199–W205 (2019).
65. Love, M. I., Huber, W. & Anders, S. Moderated estimation of fold change and dispersion for RNA-seq data with DESeq2. *Genome Biol.* **15**, 550 (2014).
66. Eisen, M. B., Spellman, P. T., Brown, P. O. & Botstein, D. Cluster analysis and display of genome-wide expression patterns. *Proc. Natl. Acad. Sci.* **95**, 14863–14868 (1998).
67. Saldanha, A. J. Java Treeview--extensible visualization of microarray data. *Bioinforma. Oxf. Engl.* **20**, 3246–3248 (2004).

## Figure legends

### **Fig. 1: Hypopigmentation in CRTC3 mutant mice.**

**a)** Fur color comparison between mice with individual knockouts of CRTC family members. **b)** Quantification of melanin content in dorsal hair from WT and CRTC3 KO mice (N=3 per group). Significance determined by Welch's t-test. **c)** RT-qPCR quantification of CRTC expression levels in primary melanoblasts from WT mice (N=5). **d)** Western blot showing CRTC expression levels in primary melanocytes from WT animals. **e)** Western blots from whole skin of WT and CRTC3 KO mice (P2) showing expression of CRTCs, melanogenic enzymes and structural proteins. **f)** List of transporters from RNA-seq experiments in skins of WT and CRTC3 KO mice (P2, N=4 per group). Melanocyte-specific transporters are in bold. **g)** RT-qPCR data from sorted melanoblasts of WT and CRTC3 KO mice (P2, N=4-5 per group). Significance determined by Welch's t-test. **h)** Primary melanocytes isolated from skins of WT, CRTC1 KO, CRTC2 KO and CRTC3 KO mice (P2), cultured for 2 weeks in differentiation media. Arrows point to intracellular melanin granules that are absent from CRTC3 culture. Bar is 50µm.

### **Fig. 2: Loss of CRTC3 impairs OCA2 expression and melanosome maturation.**

**a)** Western blot and melanin quantification assay in CTRL, CRTC3 KO and CRTC3-rescued B16F1 cells following differentiation stimulus with 5µM FSK or 100µM IBMX for 60h. **b)** Tyrosinase activity in whole lysates of B16F1 cells with indicated genotypes and treatments (5µM FSK, 48h). **c)** Tyrosinase

in-gel activity (zymography) and western blot showing TYR protein accumulation levels in B16F1 cells of indicated genotypes. Cells were treated with 5 $\mu$ M FSK or 500 $\mu$ M TYR inhibitor kojic acid for 48h. **d)** Representative TEM image of melanosome maturation stages in CTRL and CRT3 KO B16F1 cells after 48h of 5 $\mu$ M FSK stimulation. Observed melanosome maturation stages are indicated with Roman lettering. Bar is 400nm. **e)** Heat map of significant differentially expressed genes in RNA-sequencing experiments of B16F1 cells with indicated genotypes and treatments (5 $\mu$ M FSK, 1h). **f)** Browser plot of genomic region containing OCA2 enhancer showing occupancy of acetylated histone H3K27, CREB, CRT3, MITF, and phospho-POLII in B16F1 cells treated with vehicle or 5 $\mu$ M FSK for 1h. Scale indicates normalized tag enrichment. **g)** Time course for OCA2 mRNA and protein induction upon 5 $\mu$ M FSK treatment, assayed through RT-qPCR and western blotting. **h)** Luciferase reporter assay in B16F1 cells transfected with OCA2 enhancer construct. Treatments (5 $\mu$ M FSK, 6h) and mutations of regulatory elements are indicated. **i)** Baseline rescue of melanogenesis in CRT3 KO B16F1 cells transiently transfected with OCA2. CTRL and CRT3 KO cells were treated with 5 $\mu$ M FSK for 60h to induce melanin synthesis. Bar is 25 $\mu$ m.

**Fig. 3: Selective Induction of CRT3 in response to ERK1/2 activation.**

**a)** Western blot showing phosphorylation of CRT3 at Ser<sup>391</sup> upon stimulation of ERK1/2 in B16F1 cells (SCF – stem cell factor (30ng/ml); HGF – hepatocyte growth factor (20ng/ml), TPA (200nM) **b)** Rescue of melanogenesis in CRT3 KO B16F1 cells after transfection with indicated constructs. Cells were treated with 5 $\mu$ M FSK for 60h, 48h after transfection **c)** Melanin production related to cAMP content in B16F1 cells stimulated with indicated compounds for 60h. **d)** Western blot of a representative sub-cellular fractionation experiment after treatment with 800nM FSK or 30ng/ml SCF for 20min. **e) f)** Western blots of indicated human cell lines in the basal state and treatment with 200nM ERK1/2 inhibitor SCH772984 for 8h. **g)** Immunofluorescence of HEK293T and A375 cells stained with hCRT3(414-432) antibody and DAPI. Bar is 20 $\mu$ m **h)** Luciferase reporter assay in A375 cells transfected with MITF proximal promoter construct. Treatments and mutations of regulatory elements are indicated. Cells were pretreated with 200nM ERK1/2 inhibitor SCH772984 for 6h before adding 100 $\mu$ M IBMX for 5h.

**Fig. 4: CRTC3 activity is associated with increased tumorigenic potential and decreased survival.**

**a)** Volcano plot of RNA-seq data showing differentially expressed genes between CTRL and CRTC3 KO A375 cells. Significance determined as adjusted p-value of  $\leq 0.05$  and  $\text{Log}_2$  fold changes of  $\leq -1$  or  $\geq 1$ . Table shows significant cluster enrichment of downregulated genes, listed in Suppl. Table 4. **b)** Quantification of cellular cAMP in CTRL and CRTC3 KO A375 cells treated with indicated compounds for 15 min. Significance determined by Welch's t-test. **c)** Representative images showing migration (24h) and invasion (72h) of CTRL and CRTC3 KO A375 cells. 2% FBS was used as a chemotactic agent. Bar is 100 $\mu\text{m}$  **d)** Representative images and quantification of migration (24h) of CRTC3 KO A375 cells treated with DMSO or PKA inhibitor H89 (10 $\mu\text{M}$ ). Bar is 50 $\mu\text{m}$ . Significance determined by one-way ANOVA and Tukey's multiple comparisons tests. **e)** Kaplan-Meyer graph of overall survival of melanoma patients from TCGA, Firehose Legacy with and without alterations in CRTC3 (N=367). Graph and statistical analyses were obtained from cbiportal.org. **f)** CRTC3 correlation analysis in human melanoma patients from TCGA, Firehose Legacy (N=367). Bubble chart shows top positively enriched processes distributed by enrichment ratio and significance. **g)** Top 10 genes positively correlated with CRTC3 from the cohort in g). **h)** Luciferase reporter assay in B16F1 cells transfected with EVX-luc-2xCRE reporter and WT or mutated CRTC3 constructs. Cells were treated with 5 $\mu\text{M}$  FSK for 6h, 48h after transfection. Assayed patient mutations are indicated and shown on sequence alignment in Suppl. Fig. 4h. Data represents two replicas run in parallel, each assayed in technical duplicates and normalized by expression of transfected CRTC3. Both replicas had comparable expression of CRTC3 constructs, one of which is shown in the western blot insert. Differences in expression of the reporter constructs were compared to WT CRTC3 and significance determined by Welch's t-test. **i)** Model for joint regulation of CRTC3 by cAMP and ERK1/2 in low cAMP state.



# Figures

**Fig. 1:** Hypopigmentation in CRTC3 knockout mice.

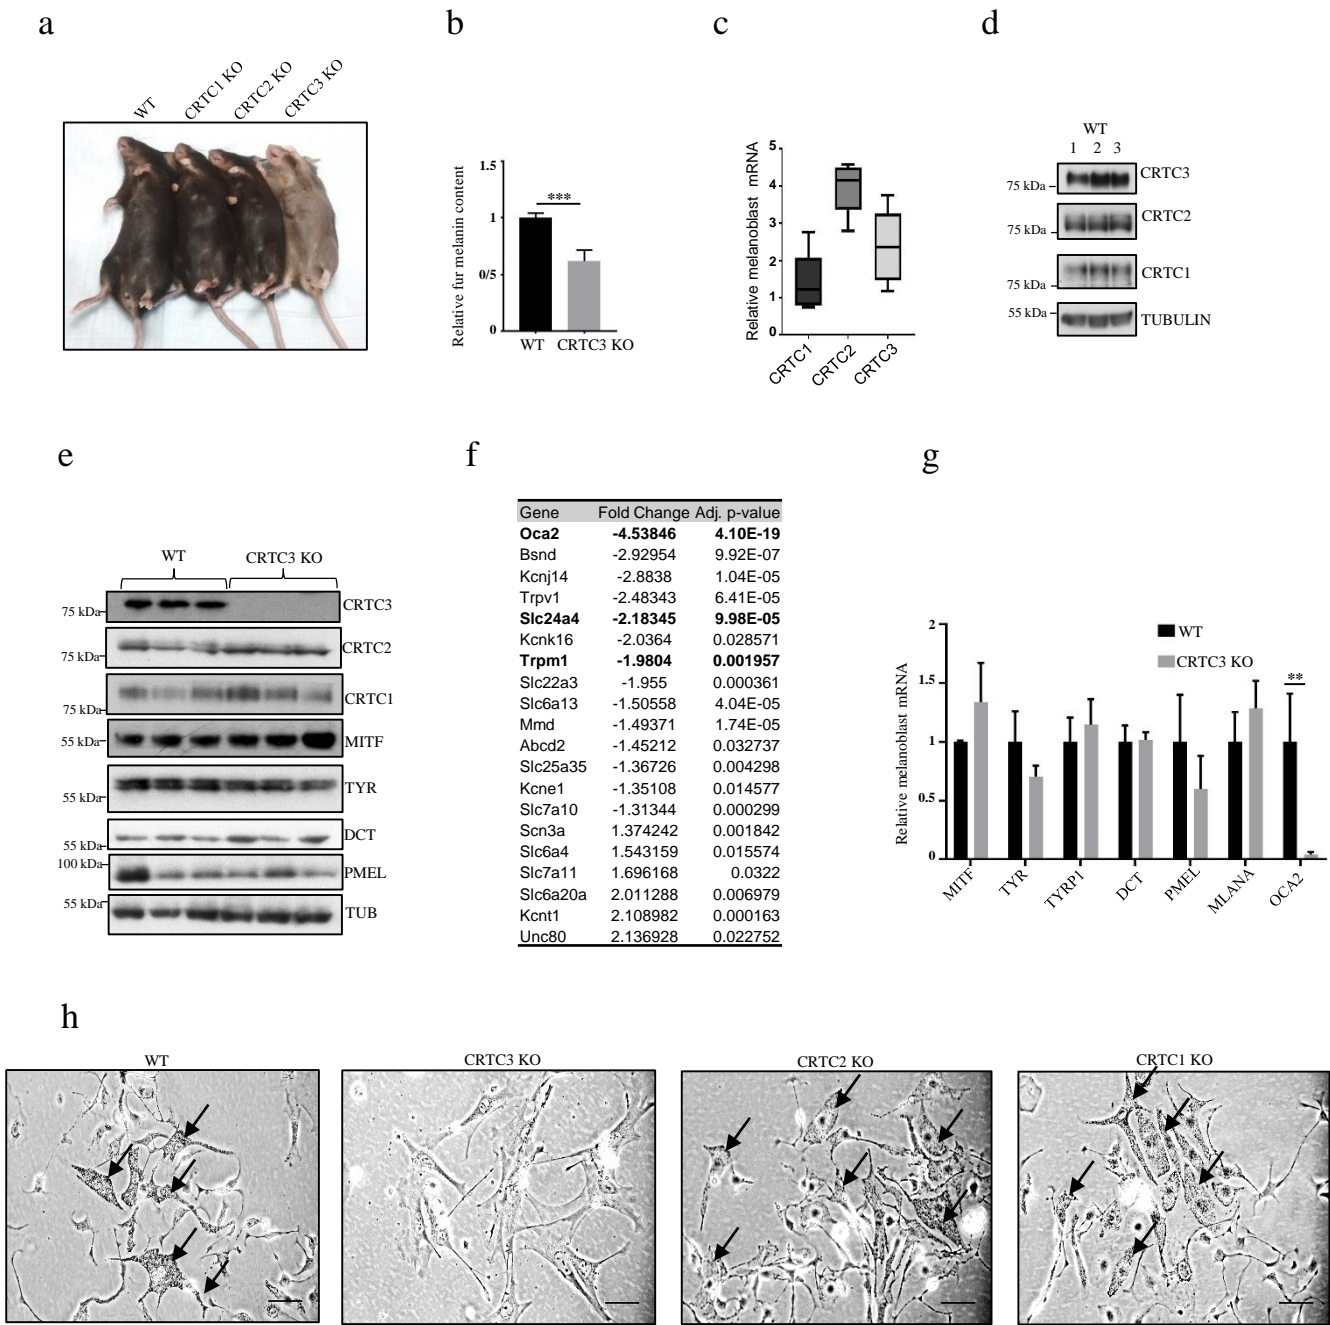

**Fig. 2:** Loss of CRTC3 impairs OCA2 expression and melanosome maturation.

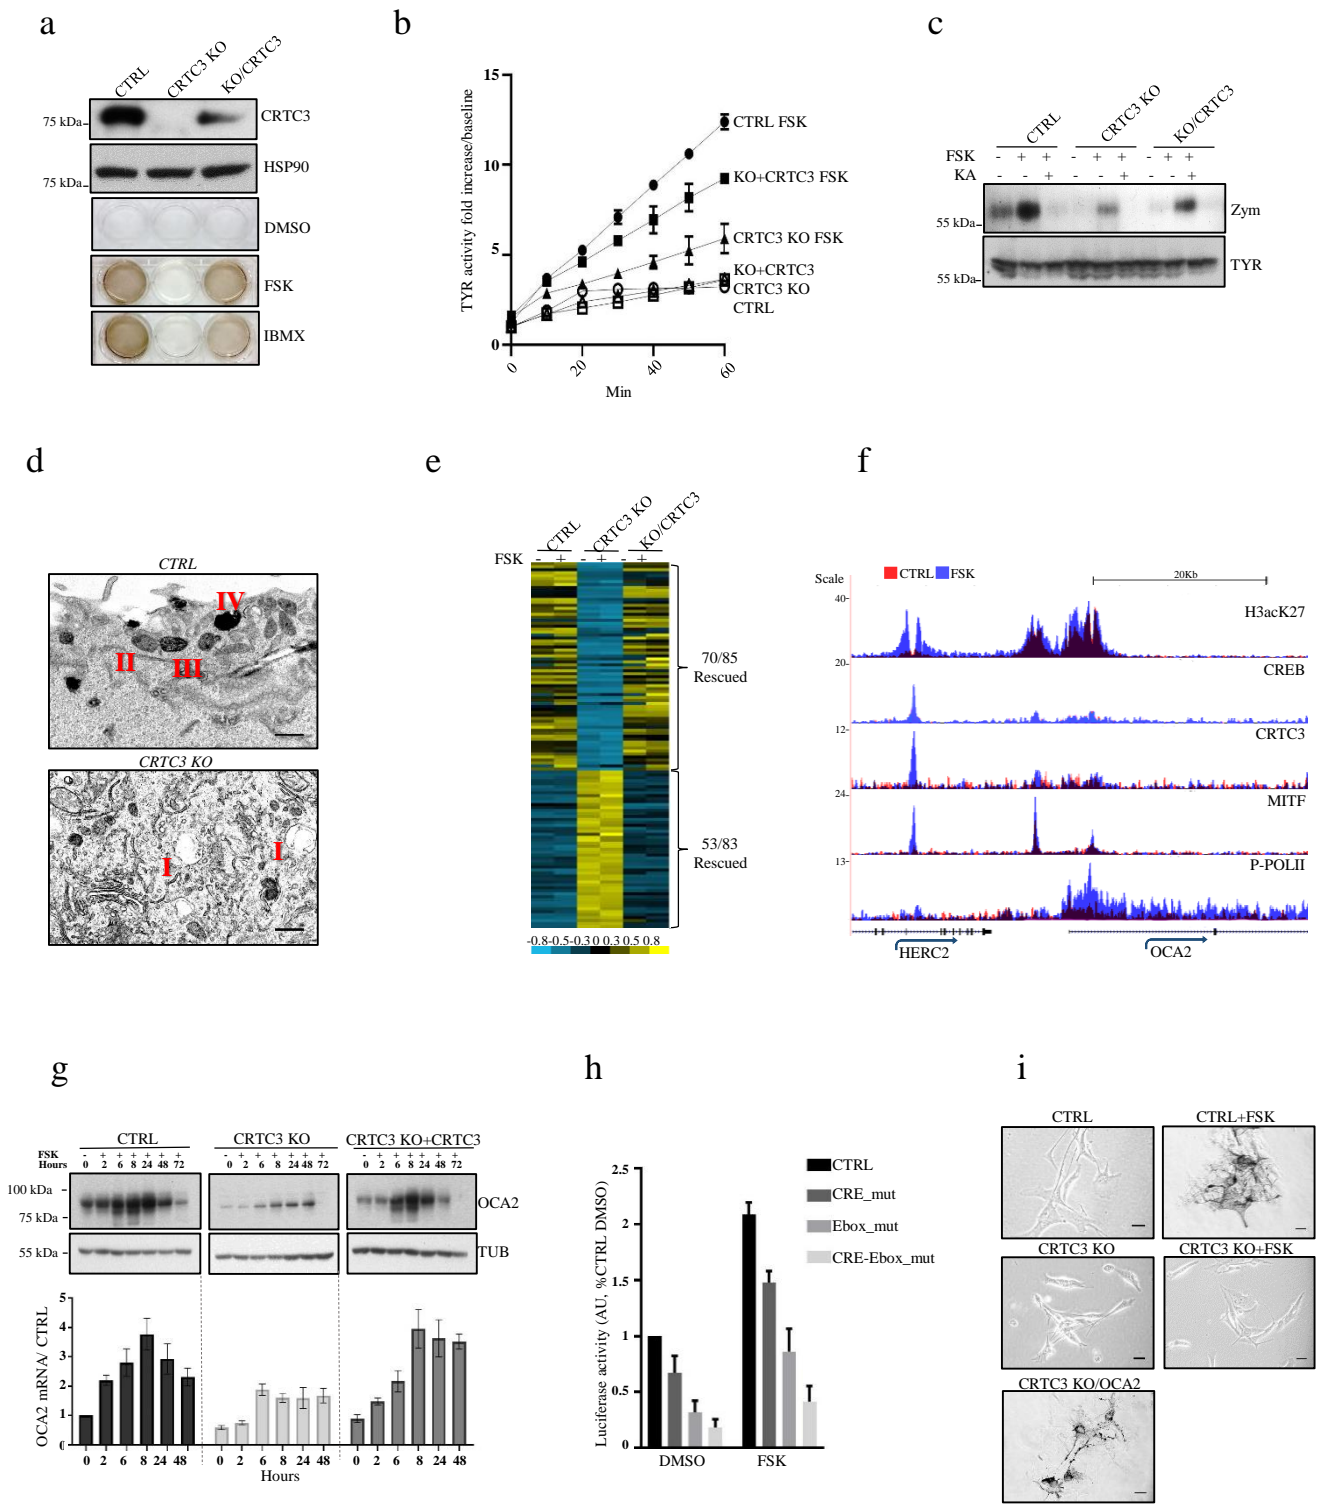



**Fig. 3: Selective Induction of CRTC3 in response to ERK activation.**

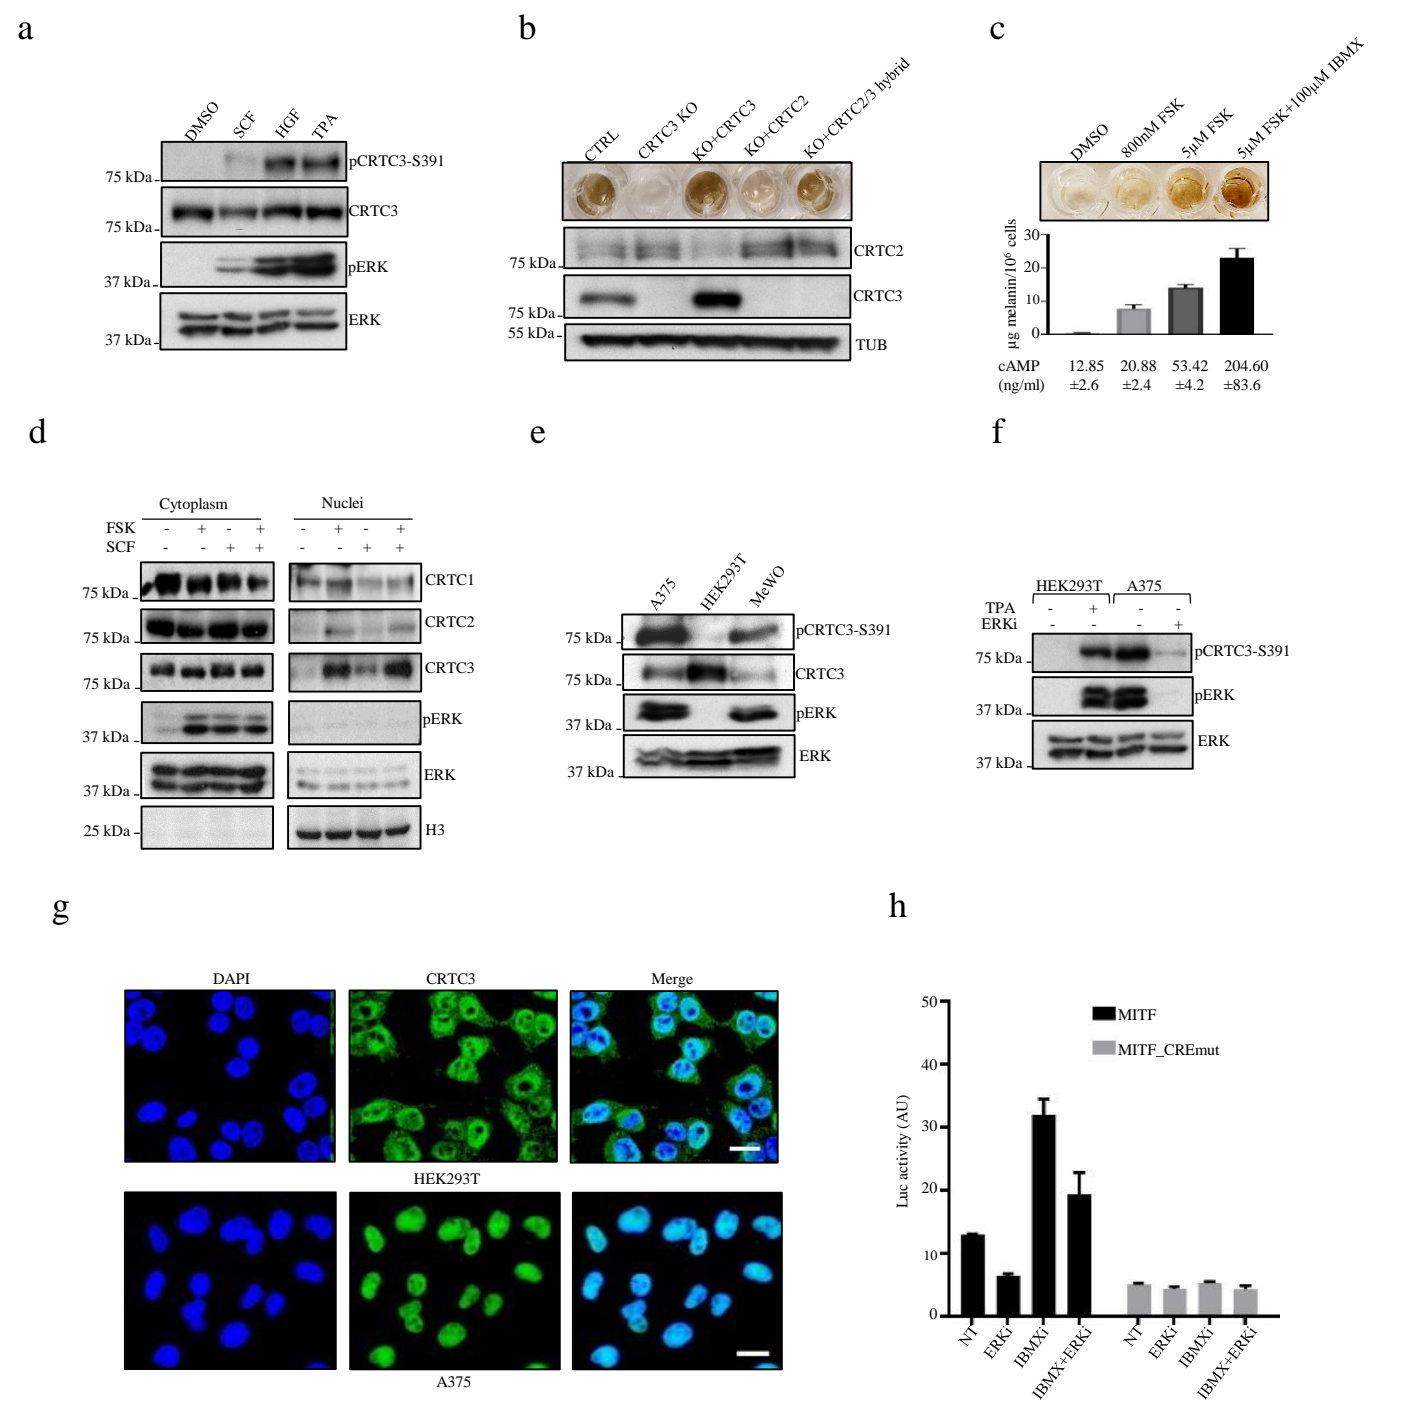

**Fig. 4:** CRTC3 activity is associated with increased tumorigenic potential and decreased survival.

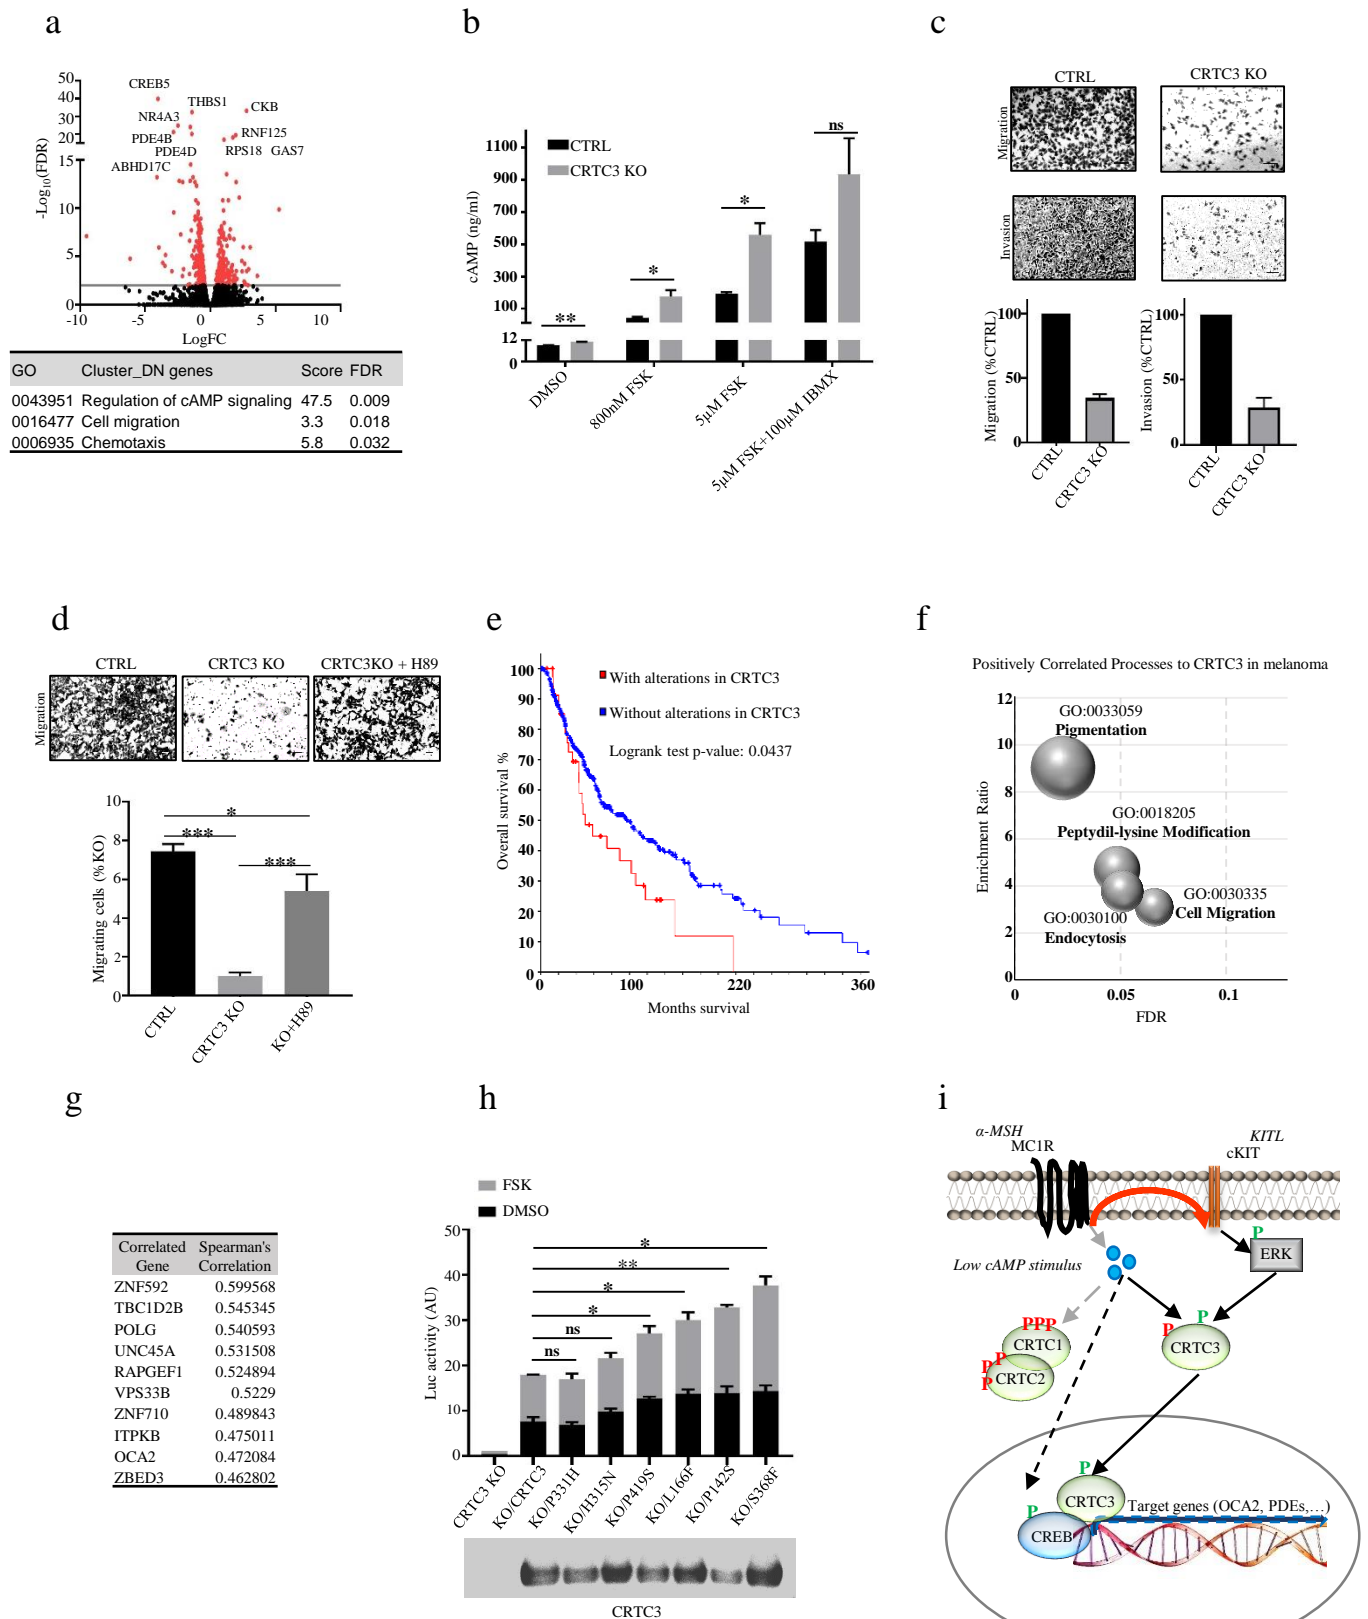

Source: https://www.biorxiv.org/content/10.1101/2020.07.14.202697v1.full.pdf
